# Supplementary material for: Oral Anticoagulants in the Oldest Old with Recent Stroke and Atrial Fibrillation
Source: PubMed Central journal article supplement (PMC9300111; doi:10.1002/ana.26267), 2021-11-29
Supplement: ANA-91-78-s001.pdf [file ANA-91-78-s001.pdf]

## Supplementary Material

Oral anticoagulants in the oldest old with recent stroke and atrial fibrillation

Polymeris et al

### Table of Contents

|                                                                                                                                                                                      |   |
|--------------------------------------------------------------------------------------------------------------------------------------------------------------------------------------|---|
| Supplementary Table 1. Participating cohort studies .....                                                                                                                            | 1 |
| Supplementary Table 2. Cox proportional cause-specific hazards models for time to recurrent ischemic stroke, intracranial hemorrhage and death, accounting for competing risks ..... | 2 |
| Supplementary Table 3. Net clinical benefit of DOAC over VKA .....                                                                                                                   | 3 |
| Supplementary Table 4. Cox models for time to composite outcome using age dichotomized at 90 years .....                                                                             | 4 |
| Supplementary Table 5. Complete list of investigators of the cohort studies that contributed patients to this analysis .....                                                         | 5 |

**Supplementary Table 1.** Participating cohort studies

| <b>Cohort study</b>  | <b>Study period</b>        | <b>Number of patients contributed to the final pooled cohort in this study</b> | <b>Median follow-up (days)</b> |
|----------------------|----------------------------|--------------------------------------------------------------------------------|--------------------------------|
| <b>Single-center</b> |                            |                                                                                |                                |
| NOACISP-LONGTERM*    | 2012 – 2019                | 798                                                                            | 717                            |
| Erlangen Registry*   | 2011 – 2013<br>2016 – 2019 | 1,174                                                                          | 107                            |
| Verona Registry      | 2013 – 2015                | 222                                                                            | 90                             |
| <b>Multicenter</b>   |                            |                                                                                |                                |
| CROMIS-2             | 2011 – 2015                | 1,245                                                                          | 786                            |
| RAF                  | 2012 – 2014                | 553                                                                            | 90                             |
| RAF-DOAC             | 2014 – 2016                | 868                                                                            | 90                             |
| SAMURAI-NVAF         | 2011 – 2014                | 1,124                                                                          | 717                            |

\* The datasets of these ongoing studies were updated since the initial data pooling (Seiffge et al. Ann Neurol 2019) to include additional patients with index event up to December 31<sup>st</sup>, 2019.

**Supplementary Table 2.** Cox proportional cause-specific hazards models for time to recurrent ischemic stroke, intracranial hemorrhage and death, accounting for competing risks

| Model<br>(N = 5,984)                  | Variable                      | Recurrent ischemic stroke |                          |         | Intracranial hemorrhage |                          |         | All-cause death |                          |         |
|---------------------------------------|-------------------------------|---------------------------|--------------------------|---------|-------------------------|--------------------------|---------|-----------------|--------------------------|---------|
|                                       |                               | Hazard ratio              | 95 % confidence interval | p-value | Hazard ratio            | 95 % confidence interval | p-value | Hazard ratio    | 95 % confidence interval | p-value |
| simple model                          | DOAC (vs. VKA)                | 0.90                      | [0.67, 1.20]             | 0.463   | 0.38                    | [0.20, 0.72]             | 0.003   | 0.72            | [0.60, 0.88]             | <0.001  |
|                                       | Age <85 years (vs. ≥85 years) | 0.83                      | [0.63, 1.10]             | 0.193   | 0.78                    | [0.45, 1.37]             | 0.391   | 0.34            | [0.29, 0.39]             | <0.001  |
| simple model with interaction term    | DOAC (vs. VKA)                | 0.87                      | [0.53, 1.44]             | 0.591   | 0.60                    | [0.22, 1.69]             | 0.334   | 0.61            | [0.47, 0.79]             | <0.001  |
|                                       | Age <85 years (vs. ≥85 years) | 0.82                      | [0.54, 1.22]             | 0.323   | 1.01                    | [0.48, 2.12]             | 0.988   | 0.29            | [0.23, 0.36]             | <0.001  |
|                                       | Interaction OAC by age        | 1.04                      | [0.60, 1.81]             | 0.885   | 0.53                    | [0.17, 1.66]             | 0.277   | 1.36            | [1.00, 1.86]             | 0.054   |
| adjusted model* with interaction term | DOAC (vs. VKA)                | 0.90                      | [0.55, 1.50]             | 0.692   | 0.58                    | [0.21, 1.63]             | 0.303   | 0.66            | [0.51, 0.86]             | 0.002   |
|                                       | Age <85 years (vs. ≥85 years) | 0.85                      | [0.57, 1.29]             | 0.449   | 0.91                    | [0.43, 1.95]             | 0.814   | 0.29            | [0.23, 0.36]             | <0.001  |
|                                       | Interaction OAC by age        | 1.06                      | [0.61, 1.85]             | 0.825   | 0.55                    | [0.18, 1.71]             | 0.300   | 1.42            | [1.04, 1.94]             | 0.029   |
| weighted model† with interaction term | DOAC (vs. VKA)                | 1.17                      | [0.64, 2.14]             | 0.612   | 0.74                    | [0.26, 2.15]             | 0.581   | 0.76            | [0.57, 1.01]             | 0.058   |
|                                       | Age <85 years (vs. ≥85 years) | 1.06                      | [0.59, 1.91]             | 0.835   | 1.41                    | [0.53, 3.74]             | 0.494   | 0.32            | [0.24, 0.43]             | <0.001  |
|                                       | Interaction OAC by age        | 0.72                      | [0.36, 1.46]             | 0.366   | 0.36                    | [0.09, 1.41]             | 0.143   | 1.32            | [0.89, 1.96]             | 0.165   |

\*adjustment for sex, National Institutes of Health Stroke Scale score at baseline, modified CHA<sub>2</sub>DS<sub>2</sub>-VASc score (without the age and sex components)

†weighting for sex, National Institutes of Health Stroke Scale score at baseline, history of prior stroke or transient ischemic attack, history of intracranial hemorrhage, diabetes mellitus, hypertension, dyslipidemia, estimated glomerular filtration rate, current smoking, concomitant antiplatelet use, cohort study

OAC, oral anticoagulant; DOAC, direct oral anticoagulant; VKA, Vitamin K antagonist

**Supplementary Table 3.** Net clinical benefit of DOAC over VKA

| ICH weight | Patients aged ≥85 years                                                                    |                                                                                             |                                                             | Patients aged <85 years                                                                    |                                                                                             |                                                             |
|------------|--------------------------------------------------------------------------------------------|---------------------------------------------------------------------------------------------|-------------------------------------------------------------|--------------------------------------------------------------------------------------------|---------------------------------------------------------------------------------------------|-------------------------------------------------------------|
|            | weighted rate of events*<br>in VKA-treated patients<br>[95%-CI]<br>(per 100 patient-years) | weighted rate of events*<br>in DOAC-treated patients<br>[95%-CI]<br>(per 100 patient-years) | NCB of DOAC over VKA<br>[95%-CI]<br>(per 100 patient-years) | weighted rate of events*<br>in VKA-treated patients<br>[95%-CI]<br>(per 100 patient-years) | weighted rate of events*<br>in DOAC-treated patients<br>[95%-CI]<br>(per 100 patient-years) | NCB of DOAC over VKA<br>[95%-CI]<br>(per 100 patient-years) |
| 1.5        | 8.17 [4.76, 11.51]                                                                         | 6.44 [4.40, 8.60]                                                                           | +1.73 [-2.47, +5.68]                                        | 6.84 [5.13, 8.64]                                                                          | 4.94 [3.93, 5.94]                                                                           | +1.90 [-0.10, +3.98]                                        |
| 1.6        | 8.33 [4.70, 11.85]                                                                         | 6.54 [4.35, 8.78]                                                                           | +1.79 [-2.32, +5.80]                                        | 6.98 [5.13, 8.76]                                                                          | 4.99 [3.98, 6.00]                                                                           | +1.99 [-0.05, +4.14]                                        |
| 1.7        | 8.49 [4.98, 11.99]                                                                         | 6.64 [4.29, 8.91]                                                                           | +1.85 [-2.32, +6.29]                                        | 7.12 [5.23, 8.96]                                                                          | 5.04 [3.96, 6.03]                                                                           | +2.08 [+0.01, +4.10]                                        |
| 1.8        | 8.65 [4.99, 12.21]                                                                         | 6.74 [4.45, 9.01]                                                                           | +1.91 [-2.60, +6.40]                                        | 7.25 [5.26, 9.14]                                                                          | 5.08 [4.03, 6.17]                                                                           | +2.17 [+0.00, +4.28]                                        |
| 1.9        | 8.80 [5.21, 12.55]                                                                         | 6.84 [4.40, 9.13]                                                                           | +1.96 [-2.65, +6.26]                                        | 7.39 [5.58, 9.27]                                                                          | 5.12 [4.06, 6.20]                                                                           | +2.27 [+0.11, +4.48]                                        |
| 2.0        | 8.95 [5.02, 12.67]                                                                         | 6.93 [4.47, 9.30]                                                                           | +2.02 [-2.51, +6.27]                                        | 7.53 [5.45, 9.55]                                                                          | 5.17 [4.09, 6.31]                                                                           | +2.36 [+0.21, +4.59]                                        |
| 2.1        | 9.11 [5.02, 12.95]                                                                         | 7.03 [4.50, 9.50]                                                                           | +2.08 [-2.66, +6.77]                                        | 7.67 [5.59, 9.64]                                                                          | 5.22 [4.14, 6.29]                                                                           | +2.45 [+0.19, +4.82]                                        |
| 2.2        | 9.27 [5.16, 13.18]                                                                         | 7.13 [4.58, 9.58]                                                                           | +2.14 [-2.62, +6.69]                                        | 7.80 [5.67, 9.85]                                                                          | 5.26 [4.08, 6.40]                                                                           | +2.54 [+0.13, +4.93]                                        |
| 2.3        | 9.42 [5.56, 13.27]                                                                         | 7.23 [4.75, 9.68]                                                                           | +2.19 [-2.59, +6.92]                                        | 7.94 [5.82, 10.15]                                                                         | 5.31 [4.17, 6.44]                                                                           | +2.63 [+0.34, +5.07]                                        |
| 2.4        | 9.58 [5.54, 13.55]                                                                         | 7.33 [4.66, 9.98]                                                                           | +2.25 [-2.67, +7.03]                                        | 8.07 [5.86, 10.41]                                                                         | 5.35 [4.19, 6.50]                                                                           | +2.72 [+0.28, +5.11]                                        |
| 2.5        | 9.73 [5.65, 13.73]                                                                         | 7.42 [4.81, 10.00]                                                                          | +2.31 [-2.84, +7.28]                                        | 8.21 [6.01, 10.38]                                                                         | 5.40 [4.27, 6.52]                                                                           | +2.81 [+0.43, +5.37]                                        |
| 2.6        | 9.89 [5.72, 14.19]                                                                         | 7.52 [4.81, 10.15]                                                                          | +2.37 [-2.53, +7.47]                                        | 8.34 [6.06, 10.74]                                                                         | 5.44 [4.30, 6.54]                                                                           | +2.90 [+0.38, +5.37]                                        |
| 2.7        | 10.05 [5.64, 14.44]                                                                        | 7.62 [4.83, 10.39]                                                                          | +2.43 [-2.70, +7.55]                                        | 8.48 [6.15, 10.86]                                                                         | 5.49 [4.33, 6.69]                                                                           | +2.99 [+0.32, +5.64]                                        |
| 2.8        | 10.20 [5.81, 14.43]                                                                        | 7.72 [4.58, 10.55]                                                                          | +2.48 [-2.71, +7.58]                                        | 8.62 [6.17, 11.09]                                                                         | 5.53 [4.32, 6.69]                                                                           | +3.09 [+0.51, +5.77]                                        |
| 2.9        | 10.36 [6.00, 14.75]                                                                        | 7.82 [4.89, 10.68]                                                                          | +2.54 [-2.71, +7.68]                                        | 8.76 [6.34, 11.23]                                                                         | 5.58 [4.41, 6.77]                                                                           | +3.18 [+0.52, +5.88]                                        |
| 3.0        | 10.51 [5.76, 15.39]                                                                        | 7.91 [4.84, 10.87]                                                                          | +2.60 [-2.93, +8.00]                                        | 8.89 [6.36, 11.43]                                                                         | 5.62 [4.41, 6.85]                                                                           | +3.27 [+0.37, +6.12]                                        |
| 3.1        | 10.67 [5.93, 15.36]                                                                        | 8.01 [5.01, 11.00]                                                                          | +2.66 [-3.01, +8.21]                                        | 9.03 [6.39, 11.65]                                                                         | 5.67 [4.48, 6.94]                                                                           | +3.36 [+0.37, +6.36]                                        |

\*calculated as [rate of ischemic stroke + (ICH weight x rate of ICH)]

DOAC, direct oral anticoagulant; VKA, Vitamin K antagonist; ICH, intracranial hemorrhage

**Supplementary Table 4.** Cox models for time to composite outcome using age dichotomized at 90 years

| <b>Model</b><br>(N = 5,984)           | <b>Variable</b>               | <b>Hazard ratio</b> | <b>95% confidence interval</b> | <b>p-value</b> |
|---------------------------------------|-------------------------------|---------------------|--------------------------------|----------------|
| simple model                          | DOAC (vs. VKA)                | 0.74                | [0.63, 0.86]                   | <0.001         |
|                                       | Age <90 years (vs. ≥90 years) | 0.45                | [0.38, 0.56]                   | <0.001         |
| simple model with interaction term    | DOAC (vs. VKA)                | 0.62                | [0.44, 0.88]                   | 0.006          |
|                                       | Age <90 years (vs. ≥90 years) | 0.41                | [0.33, 0.52]                   | <0.001         |
|                                       | Interaction OAC by age        | 1.21                | [0.85, 1.73]                   | 0.283          |
| adjusted model* with interaction term | DOAC (vs. VKA)                | 0.73                | [0.52, 1.03]                   | 0.077          |
|                                       | Age <90 years (vs. ≥90 years) | 0.47                | [0.37, 0.59]                   | <0.001         |
|                                       | Interaction OAC by age        | 1.13                | [0.79, 1.60]                   | 0.514          |
| weighted model† with interaction term | DOAC (vs. VKA)                | 0.74                | [0.52, 1.07]                   | 0.111          |
|                                       | Age <90 years (vs. ≥90 years) | 0.44                | [0.33, 0.58]                   | <0.001         |
|                                       | Interaction OAC by age        | 1.18                | [0.79, 1.76]                   | 0.433          |

\*adjustment for sex, National Institutes of Health Stroke Scale score at baseline, modified CHA<sub>2</sub>DS<sub>2</sub>-VASc score (without the age and sex components)

†weighting for sex, National Institutes of Health Stroke Scale score at baseline, history of prior stroke or transient ischemic attack, history of intracranial hemorrhage, diabetes mellitus, hypertension, dyslipidemia, estimated glomerular filtration rate, current smoking, concomitant antiplatelet use, cohort study

OAC, oral anticoagulant; DOAC, direct oral anticoagulant; VKA, Vitamin K antagonist

**Supplementary Table 5.** Complete list of investigators of the cohort studies that contributed patients to this analysis

| Cohort Study / Investigator | Affiliation                                                |
|-----------------------------|------------------------------------------------------------|
| <b>NOACISP-LONGTERM</b>     |                                                            |
| Stefan T Engelter           | University Hospital Basel, Switzerland                     |
| Philippe A Lyrer            |                                                            |
| Leo H Bonati                |                                                            |
| David J Seiffge             |                                                            |
| Christopher Traenka         |                                                            |
| Alexandros A Polymeris      |                                                            |
| Annaelle Zietz              |                                                            |
| Nils Peters                 |                                                            |
| Gian Marco De Marchis       |                                                            |
| Sebastian Thilemann         |                                                            |
| Nikolaos S Avramiotis       |                                                            |
| Henrik Gensicke             |                                                            |
| Lisa Hert                   |                                                            |
| Benjamin Wagner             |                                                            |
| Fabian Schaub               |                                                            |
| Louisa Meya                 |                                                            |
| Joachim Fladt               |                                                            |
| Tolga Dittrich              |                                                            |
| Urs Fisch                   |                                                            |
| <b>Erlangen Registry</b>    |                                                            |
| Kosmas Macha                | University of Erlangen-Nuremberg, Germany                  |
| David Hauptenthal           |                                                            |
| Luise Gassmann              |                                                            |
| Ruihao Wang                 |                                                            |
| Svenja Stoll                |                                                            |
| Stefan Schwab               |                                                            |
| Bastian Volbers             |                                                            |
| Gabriela Siedler            |                                                            |
| Bernd Kallmünzer            |                                                            |
| <b>Verona Registry</b>      |                                                            |
| Manuel Cappellari           | Azienda Ospedaliera Universitaria Integrata, Verona, Italy |
| Bruno Bonetti               |                                                            |
| Paolo Bovi                  |                                                            |
| Giampaolo Tomelleri         |                                                            |
| Nicola Micheletti           |                                                            |
| Cecilia Zivelonghi          |                                                            |
| Andrea Emiliani             |                                                            |
| <b>CROMIS-2</b>             |                                                            |
| Adrian Parry-Jones          | Salford Royal Hospital, UK                                 |
| Chris Patterson             | Bradford Royal Infirmary, UK                               |
| Christopher Price           | Northumbria Hospitals NHS Trust, UK                        |
| Abduelbaset Elmarimi        | Bedford Hospital, UK                                       |

|                        |                                                  |
|------------------------|--------------------------------------------------|
| Anthea Parry           | Hillingdon Hospital, UK                          |
| Arumug Nallasivam      | Countess of Chester Hospital, UK                 |
| Azlisham Mohd Nor      | Derriford Hospital, UK                           |
| Bernard Esis           | County Durham & Darlington Hospital, UK          |
| David Bruce            | County Durham & Darlington Hospital, UK          |
| Biju Bhaskaran         | Torbay District Hospital, UK                     |
| Christine Roffe        | University Hospital of North Staffordshire, UK   |
| Claire Cullen          | Aintree University Hospital, UK                  |
| Clare Holmes           | Bristol Royal Infirmary, UK                      |
| David Cohen            | Northwick Park Hospital, UK                      |
| David Hargroves        | William Harvey Hospital, UK                      |
| David Mangion          | Pilgrim Hospital, Boston, UK                     |
| Dinesh Chadha          | Doncaster Royal Infirmary, UK                    |
| Djamil Vahidassr       | Antrim Area Hospital, UK                         |
| Dulka Manawadu         | King's College Hospital, UK                      |
| Elio Giallombardo      | Winchester Hospital, UK                          |
| Elizabeth Warburton    | Addenbrooke's Hospital, UK                       |
| Enrico Flossman        | Royal Berkshire Hospital, UK                     |
| Gunaratam Gunathilagan | Queen Elizabeth The Queen Mother Hospital, UK    |
| Harald Proschel        | Dorset County Hospital, UK                       |
| Hedley Emsley          | Royal Preston Hospital, UK                       |
| Ijaz Anwar             | University Hospital Hartlepool, UK               |
| Ilse Burger            | Kent & Canterbury Hospital, UK                   |
| James Okwera           | Rotherham General Hospital, UK                   |
| Janet Putterill        | Epsom Hospital, UK                               |
| Janice O'Connell       | Royal Sunderland Hospital, UK                    |
| John Bamford           | Leeds General Infirmary, UK                      |
| John Corrigan          | Weston General Hospital, UK                      |
| Jon Scott              | South Tyneside NHS Foundation Trust, UK          |
| Jonathan Birns         | St Thomas' Hospital, London, UK                  |
| Karen Kee              | Croydon University Hospital, UK                  |
| Kari Saastamoinen      | Royal London Hospital, UK                        |
| Kath Pasco             | Royal Surrey County Hospital, UK                 |
| Krishna Dani           | Southern General Hospital, UK                    |
| Lakshmanan Sekaran     | Luton & Dunstable Hospital, UK                   |
| Lillian Choy           | St George's Hospital, London, UK                 |
| Liz Iveson             | York Teaching Hospitals NHS Foundation Trust, UK |
| Maam Mamun             | Medway Maritime Hospital, UK                     |
| Mahmud Sajid           | Chesterfield Royal Hospital, UK                  |
| Martin Cooper          | Sherwood Forest Hospital, UK                     |
| Matthew Burn           | Buckinghamshire Healthcare NHS Trust, UK         |
| Matthew Smith          | Airedale General Hospital, UK                    |
| Michael Power          | Ulster Hospital, UK                              |
| Michelle Davis         | Royal Victoria Hospital, UK                      |
| Nigel Smyth            | Royal Hampshire County Hospital, UK              |
| Roland Veltkamp        | Charing Cross Hospital, London, UK               |
| Pankaj Sharma          | Charing Cross Hospital, London, UK               |
| Paul Guyler            | Southend Hospital, UK                            |
| Paul O'Mahony          | St Helier Hospital, UK                           |

|                                |                                                                                   |
|--------------------------------|-----------------------------------------------------------------------------------|
| Peter Wilkinson                | Ashford & St Peter's Hospital, UK                                                 |
| Prabel Datta                   | Mid Yorkshire Hospital, UK                                                        |
| Prasanna Aghoram               | Darent Valley Hospital, UK                                                        |
| Rachel Marsh                   | Leicester Royal Infirmary, UK                                                     |
| Robert Luder                   | North Middlesex University Hospital, UK                                           |
| Sanjeevikumar Meenakishundaram | Whiston Hospital, UK                                                              |
| Santhosh Subramonian           | Peterborough & Stamford Hospital, UK                                              |
| Simon Leach                    | Lincoln County Hospital, UK                                                       |
| Sissi Ispoglou                 | West Sandwell & Birmingham Hospital, UK                                           |
| Sreeman Andole                 | Queen's Hospital, Romford, UK                                                     |
| Timothy England                | Derby Hospital, UK                                                                |
| Aravindakshan Manoj            | Liverpool & Broadgreen Hospital, UK                                               |
| Frances Harrington             | The Royal Cornwall Hospital, UK                                                   |
| Habib Rehman                   | Royal Albert Edward Infirmary, UK                                                 |
| Jane Sword                     | Royal Devon & Exeter Hospital, UK                                                 |
| Julie Staals                   | University Hospital Maastricht, the Netherlands                                   |
| Karim Mahawish                 | Warrington Hospital, UK                                                           |
| Kirsty Harkness                | Royal Hallamshire Hospital, Sheffield, UK                                         |
| Louise Shaw                    | Royal United Hospital, Bath, UK                                                   |
| Michael McCormich              | Southern Trust Healthcare, UK                                                     |
| Nikola Sprigg                  | Nottingham University Hospital, UK                                                |
| Syed Mansoor                   | Princess Alexandra Hospital, UK                                                   |
| Vinodh Krishnamurthy           | Barnet & Chase Farm Hospitals, UK                                                 |
| <b>RAF / RAF-DOAC</b>          |                                                                                   |
| Michela Giustozzi              | University of Perugia, Italy                                                      |
| Monica Acciarresi              |                                                                                   |
| Giancarlo Agnelli              |                                                                                   |
| Valeria Caso                   |                                                                                   |
| Cecilia Becattini              |                                                                                   |
| Andrea Alberti                 |                                                                                   |
| Michele Venti                  |                                                                                   |
| Cataldo D'Amore                |                                                                                   |
| Maria Giulia Mosconi           |                                                                                   |
| Ludovica Anna Cimini           |                                                                                   |
| Maurizio Paciaroni             |                                                                                   |
| Fabio Bandini                  | Ospedale San Paolo, Savona, Italy                                                 |
| Georgios Tsigoulis             | University Hospital, National & Kapodistrian University of Athens, Athens, Greece |
| Chrissoula Liantinioti         |                                                                                   |
| Maria Chondrogianni            |                                                                                   |
| Shadi Yaghi                    | The Warren Alpert Medical School of Brown University, Providence, RI, USA         |
| Karen L. Furie                 |                                                                                   |
| Prasanna Tadi                  |                                                                                   |
| Marialuisa Zedde               | AUSL – IRCCS, Reggio Emilia, Italy                                                |
| Azmil H Abdul-Rahim            | University of Glasgow, Glasgow, United Kingdom                                    |
| Kennedy R Lees                 |                                                                                   |
| Paolo Bovi                     | AOUI Verona, Italy                                                                |
| Monica Carletti                |                                                                                   |
| Alberto Rigatelli              |                                                                                   |



|                         |                                                         |
|-------------------------|---------------------------------------------------------|
| Manuel Cappellari       |                                                         |
| Jukka Putaala           |                                                         |
| Liisa Tomppo            | Helsinki University Central Hospital, Helsinki, Finland |
| Turgut Tatlisumak       |                                                         |
| Simona Marcheselli      | Instituto Clinico Humanitas, Rozzano, Milano, Italy     |
| Alessandro Pezzini      |                                                         |
| Loris Poli              | University of Brescia, Italy                            |
| Alessandro Padovani     |                                                         |
| Vieri Vannucchi         | Santa Maria Nuova Hospital, Firenze, Italy              |
| Luca Masotti            |                                                         |
| Sung-II Sohn            | Keimyung University, Daegu, South Korea                 |
| Gianni Lorenzini        | Ospedale Lotti Pontedera, Azienda USL Toscana Nordovest |
| Rossana Tassi           |                                                         |
| Francesca Guideri       | AOU Senese, Siena, Italy                                |
| Maurizio Acampa         |                                                         |
| Giuseppe Martini        |                                                         |
| George Ntaios           |                                                         |
| George Athanasakis      | University of Thessaly, Larissa, Greece                 |
| Konstantinos Makaritsis |                                                         |
| Efstathia Karagkiozi    |                                                         |
| Konstantinos Vadikolias | University Hospital of Alexandroupolis, Greece          |
| Nicola Mumoli           | Ospedale Civile di Livorno, Italy                       |
| Franco Galati           | Jazzolino Hospital, Vibo Valentia, Italy                |
| Simona Sacco            |                                                         |
| Cindy Tiseo             | University of L'Aquila, Avezzano Hospital, Italy        |
| Francesco Corea         | San Giovanni Battista Hospital, Foligno                 |
| Walter Ageno            |                                                         |
| Marta Bellesini         | Insubria University, Varese, Italy                      |
| Giovanna Colombo        |                                                         |
| Giorgio Silvestrelli    |                                                         |
| Alfonso Ciccone         | ASST di Mantova, Mantova, Italy                         |
| Alessia Lanari          |                                                         |
| Umberto Scoditti        | University of Parma, Italy                              |
| Licia Denti             | University of Parma, Italy                              |
| Michelangelo Mancuso    |                                                         |
| Miriam Maccarrone       | Azienda Ospedaliero-Universitaria, Pisa, Italy          |
| Leonardo Ulivi          |                                                         |
| Giovanni Orlandi        |                                                         |
| Nicola Giannini         |                                                         |
| Tiziana Tassinari       | Santa Corona Hospital, Pietra Ligure (Savona), Italy    |
| Maria Luisa De Lodovici | Neurology, Insubria University, Varese, Italy           |
| Christina Rueckert      | Oberschwabenklinik, Ravensburg, Germany                 |
| Antonio Baldi           | Ospedale di Portogruaro, Portogruaro, Venice, Italy     |
| Danilo Toni             |                                                         |
| Federica Letteri        | Sapienza University of Rome, Italy                      |
| Alessio Pieroni         |                                                         |
| Martina Giuntini        | Ospedale Apuano, Massa Carrara, Italy                   |
| Enrico Maria Lotti      | Ospedale di Ravenna Azienda USL della Romagna, Italy    |
| Yuriy Flomin            | Universal Clinic 'Oberig' Kyiv, Ukraine                 |

|                           |                                                            |
|---------------------------|------------------------------------------------------------|
| Odysseas Kargiotis        | Metropolitan Hospital, Piraeus, Greece                     |
| Theodore Karapanayiotides | AHEPA University Hospital, Thessaloniki, Greece            |
| Serena Monaco             | Ospedale Civico, Palermo, Italy                            |
| Mario Maimone Baronello   |                                                            |
| Laszlo Csiba              | University of Debrecen, Hungary                            |
| Lilla Szabó               |                                                            |
| Alberto Chiti             | Sant'Andrea Hospital, La Spezia, Italy                     |
| Elisa Giorli              |                                                            |
| Massimo Del Sette         |                                                            |
| Davide Imberti            | Ospedale Civile di Piacenza, Italy                         |
| Dorjan Zabzuni            |                                                            |
| Boris Doronin             | Novosibirsk State Medical University, Russia               |
| Vera Volodina             |                                                            |
| Patrik Michel             | Hopitalier Universitaire Vaudois, Lausanne, Switzerland    |
| Peter Vanacker            | Born Bunge Institute, Antwerp University Hospital, Belgium |
| Kristian Barlinn          | Dresden University Stroke Center, Dresden, Germany         |
| Lars-Peder Pallesen       |                                                            |
| Jessica Barlinn           |                                                            |
| Dirk Deleu                | Hamad Medical Corporation, Doha, Qatar                     |
| Gayane Melikyan           |                                                            |
| Faisal Ibrahim            |                                                            |
| Naveed Akhtar             |                                                            |
| Vanessa Gourbali          | Evangelismos Hospital, Athens, Greece                      |
| <b>SAMURAI-NVAF</b>       |                                                            |
| Kenichi Todo              | Osaka University Graduate School of Medicine, Japan        |
| Kazumi Kimura             | Kawasaki Medical School, Japan                             |
| Kensaku Shibazaki         |                                                            |
| Yoshiki Yagita            |                                                            |
| Eisuke Furui              | Kohnan Hospital, Japan                                     |
| Ryo Itabashi              |                                                            |
| Tadashi Terasaki          | Japanese Red Cross Kumamoto Hospital, Japan                |
| Yoshiaki Shiokawa         | Kyorin University School of Medicine, Japan                |
| Teruyuki Hirano           |                                                            |
| Rieko Suzuki              |                                                            |
| Kenji Kamiyama            | Nakamura Memorial Hospital, Japan                          |
| Jyoji Nakagawara          |                                                            |
| Shunya Takizawa           | Tokai University School of Medicine, Japan                 |
| Kazunari Homma            |                                                            |
| Satoshi Okuda             | NHO Nagoya Medical Center, Japan                           |
| Yasushi Okada             |                                                            |
| Koichiro Maeda            |                                                            |
| Tomoaki Kameda            | Jichi Medical University School of Medicine, Japan         |
| Kazuomi Kario             |                                                            |
| Yoshinari Nagakane        | Kyoto Second Red Cross Hospital, Japan                     |
| Yasuhiro Hasegawa         | St Marianna University School of Medicine, Japan           |
| Hisanao Akiyama           |                                                            |
| Satoshi Shibuya           | South Miyagi Medical Center, Japan                         |
| Hiroshi Mochizuki         |                                                            |

|                     |                                                    |
|---------------------|----------------------------------------------------|
| Yasuhiro Ito        | TOYOTA Memorial Hospital, Japan                    |
| Takahiro Nakashima  | NHO Kagoshima Medical Center, Japan                |
| Hideki Matsuoka     |                                                    |
| Kazuhiro Takamatsu  | Brain Attack Center Ota Memorial Hospital, Japan   |
| Kazutoshi Nishiyama | Kitasato University School of Medicine, Japan      |
| Kanta Tanaka        | National Cerebral and Cardiovascular Center, Japan |
| Kaoru Endo          |                                                    |
| Tetsuya Miyagi      |                                                    |
| Masato Osaki        |                                                    |
| Junpei Kobayashi    |                                                    |
| Takuya Okata        |                                                    |
| Eijiro Tanaka       |                                                    |
| Yuki Sakamoto       |                                                    |
| Keisuke Tokunaga    |                                                    |
| Hotake Takizawa     |                                                    |
| Junji Takasugi      |                                                    |
| Soichiro Matsubara  |                                                    |
| Kyoko Higashida     |                                                    |
| Takayuki Matsuki    |                                                    |
| Naoto Kinoshita     |                                                    |
| Masayuki Shiozawa   |                                                    |
| Toshihiro Ide       |                                                    |
| Takeshi Yoshimoto   |                                                    |
| Daisuke Ando        |                                                    |
| Kyohei Fujita       |                                                    |
| Masaya Kumamoto     |                                                    |
| Teppey Kamimura     |                                                    |
| Muneaki Kikuno      |                                                    |
| Tadataka Mizoguchi  |                                                    |
| Takeo Sato          |                                                    |
